# Supplementary material for: Investigating Trk Protein Expression between Oropharyngeal and Non-oropharyngeal Squamous Cell Carcinoma: Clinical Implications and Possible Roles of Human Papillomavirus Infection
Source: PubMed Central journal article supplement — Cancer Res Treat. 2018 Oct 24;51(3):1052–63. doi: 10.4143/crt.2018.411 (PMC6639231; doi:10.4143/crt.2018.411), 2018-10-24
Supplement: crt-2018-411-suppl1.pdf [file crt-2018-411-suppl1.pdf]

**S1 Table.** Clinicopathological characteristics of 396 HNSCC patients

| Variable                                           | No. (%)<br>(n=396) |
|----------------------------------------------------|--------------------|
| Sex                                                |                    |
| Male                                               | 298 (75.3)         |
| Female                                             | 98 (24.7)          |
| Age, median (IQR, yr)                              | 58 (22-88)         |
| Smoking                                            |                    |
| Never smoker                                       | 154 (38.9)         |
| Ex-smoker                                          | 80 (20.2)          |
| Current smoker                                     | 162 (40.9)         |
| Anatomical site                                    |                    |
| Oral cavity                                        | 204 (51.5)         |
| Oropharynx                                         | 122 (30.8)         |
| Hypopharynx                                        | 28 (7.1)           |
| Larynx                                             | 42 (10.6)          |
| p16 IHC status                                     |                    |
| Negative                                           | 236 (59.6)         |
| Positive                                           | 160 (40.4)         |
| Lymphovascular invasion                            |                    |
| Absent                                             | 320 (80.8)         |
| Present                                            | 76 (19.2)          |
| Perineural invasion                                |                    |
| Absent                                             | 342 (86.4)         |
| Present                                            | 54 (13.6)          |
| Resection margin status                            |                    |
| R0 <sup>a)</sup>                                   | 305 (77.0)         |
| Non-R0                                             | 91 (23.0)          |
| Pathologic T category                              |                    |
| pT1-2                                              | 326 (82.3)         |
| pT3-4                                              | 70 (17.7)          |
| Pathologic N category                              |                    |
| pN0-1                                              | 248 (62.6)         |
| pN2-3                                              | 148 (37.4)         |
| Postoperative therapy                              |                    |
| No treatment                                       | 145 (36.6)         |
| RTx alone                                          | 150 (37.9)         |
| CCRT                                               | 99 (25.0)          |
| CTx alone or other CTx alone<br>or incomplete CCRT | 2 (0.5)            |
| Recurrence/Metastasis                              |                    |
| Absent                                             | 293 (74.0)         |
| Present                                            | 103 (26.0)         |

Survival

|         |            |
|---------|------------|
| Alive   | 324 (81.8) |
| Expired | 72 (18.2)  |

---

HNSCC, head and neck squamous cell carcinoma; IQR, interquartile range; IHC, immunohistochemistry; CCRT, concurrent chemoradiotherapy; CTx, chemotherapy. <sup>a)</sup>R0 resection status was defined as complete tumor resection.
