# Supplementary material for: Investigating Trk Protein Expression between Oropharyngeal and Non-oropharyngeal Squamous Cell Carcinoma: Clinical Implications and Possible Roles of Human Papillomavirus Infection
Source: PubMed Central journal article supplement — Cancer Res Treat. 2018 Oct 24;51(3):1052–63. doi: 10.4143/crt.2018.411 (PMC6639231; doi:10.4143/crt.2018.411), 2018-10-24
Supplement: crt-2018-411-suppl4.pdf [file crt-2018-411-suppl4.pdf]

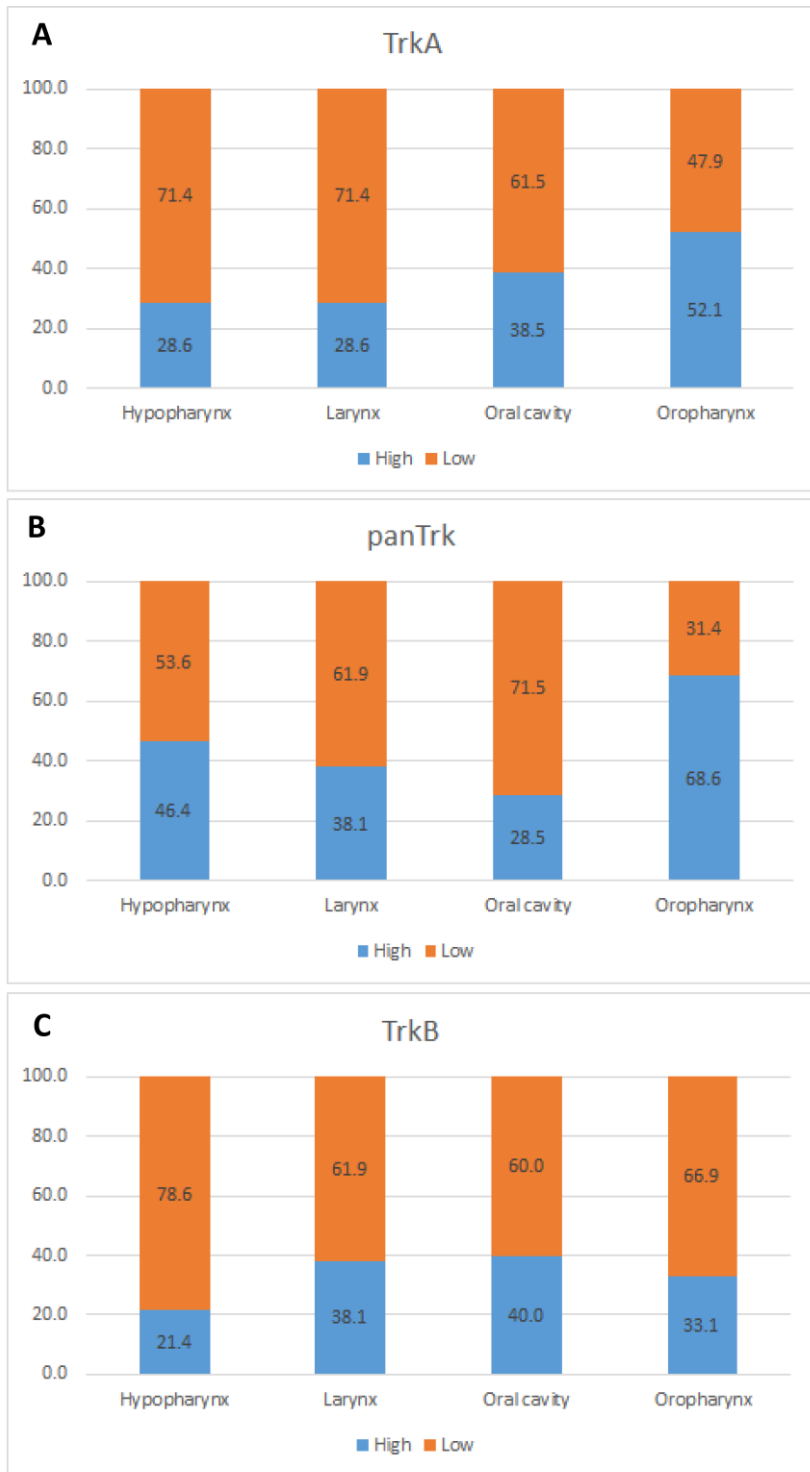

**S4 Fig.** Proportions of Trk subtype expression according to anatomical locations. Percentage of high and low expression Trk subtypes related with anatomical locations are expressed in graphs.
