# Supplementary material for: Investigating Trk Protein Expression between Oropharyngeal and Non-oropharyngeal Squamous Cell Carcinoma: Clinical Implications and Possible Roles of Human Papillomavirus Infection
Source: PubMed Central journal article supplement — Cancer Res Treat. 2018 Oct 24;51(3):1052–63. doi: 10.4143/crt.2018.411 (PMC6639231; doi:10.4143/crt.2018.411), 2018-10-24
Supplement: crt-2018-411-suppl5.pdf [file crt-2018-411-suppl5.pdf]

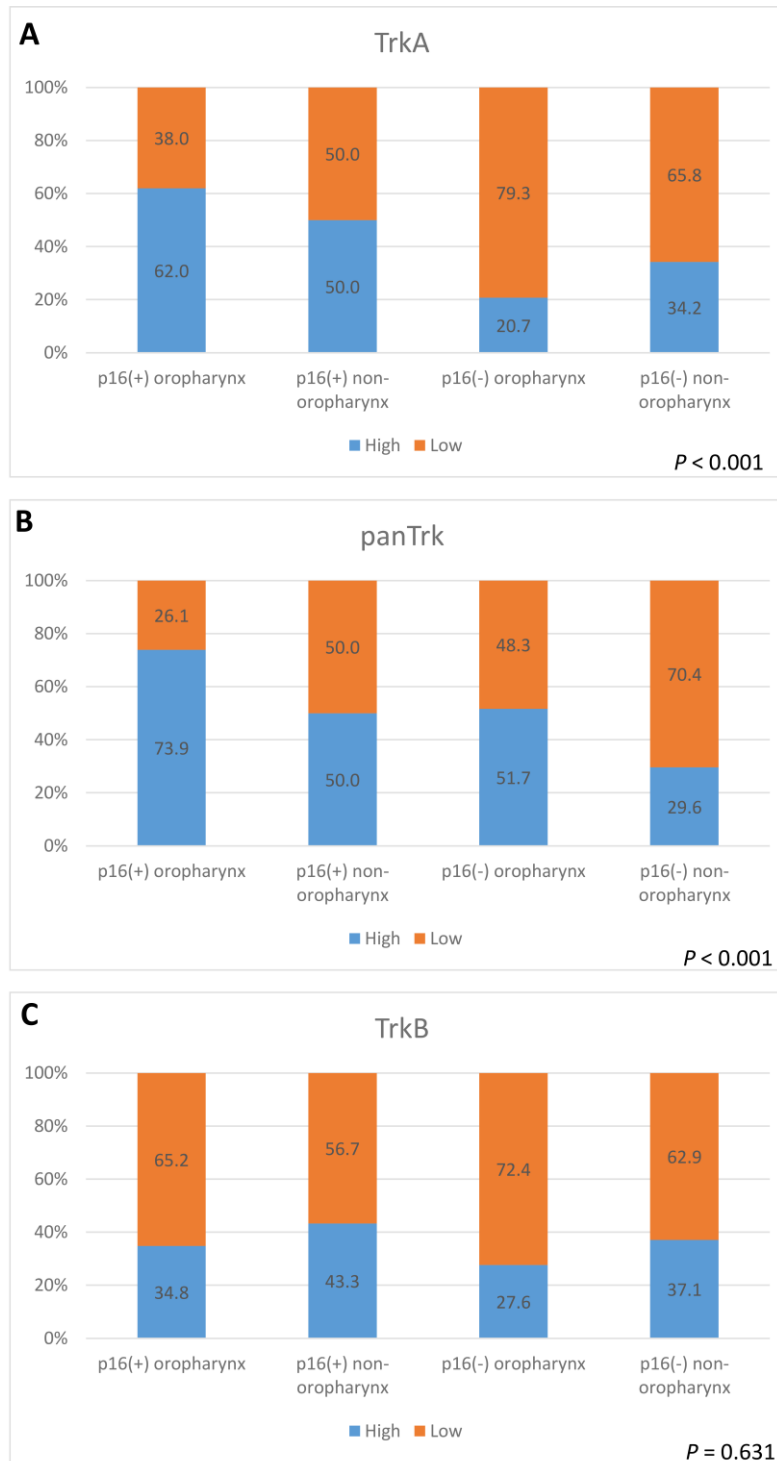

**S5 Fig.** Proportions of Trk subtype expression according to p16 immunohistochemistry status and anatomical site. Percentage of high and low expression Trk subtypes related with categories of p16 immunohistochemistry status and anatomical site are expressed in graphs.
