# Supplementary material for: Investigating Trk Protein Expression between Oropharyngeal and Non-oropharyngeal Squamous Cell Carcinoma: Clinical Implications and Possible Roles of Human Papillomavirus Infection
Source: PubMed Central journal article supplement — Cancer Res Treat. 2018 Oct 24;51(3):1052–63. doi: 10.4143/crt.2018.411 (PMC6639231; doi:10.4143/crt.2018.411), 2018-10-24
Supplement: crt-2018-411-suppl8.pdf [file crt-2018-411-suppl8.pdf]

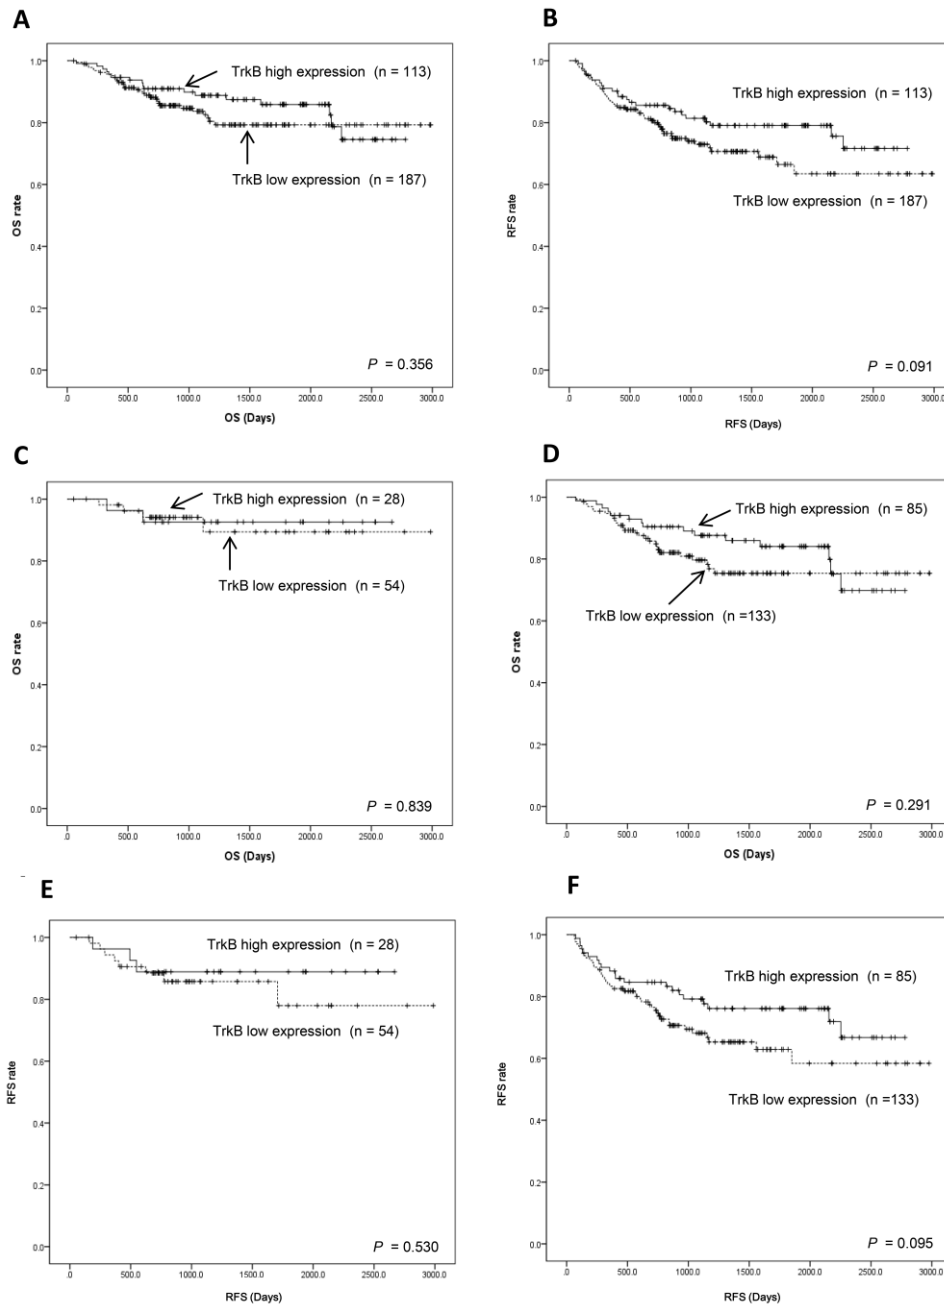

**S8 Fig.** Kaplan-Meier analysis of R0-resected head and neck squamous cell carcinomas in association with TrkB expression. (A) In analysis of 305 R0 resected cases, no significant difference was observed in OS according to TrkB expression. (B) No significant difference was observed in RFS according to TrkB expression status. Furthermore, there was no significant difference of overall survival and RFS conjunction with anatomical sites: (C) OS of R0 resected 82 oropharyngeal SCCs, (D) OS of R0 resected 218 non-oropharyngeal SCCs, (E) RFS of R0 resected 82 oropharyngeal SCCs, and (F) RFS of R0 resected 218 non-oropharyngeal SCCs. OS, overall survival; RFS, recurrence-free survival; SCC, squamous cell carcinoma.
