# Supplementary material for: Investigating Trk Protein Expression between Oropharyngeal and Non-oropharyngeal Squamous Cell Carcinoma: Clinical Implications and Possible Roles of Human Papillomavirus Infection
Source: PubMed Central journal article supplement — Cancer Res Treat. 2018 Oct 24;51(3):1052–63. doi: 10.4143/crt.2018.411 (PMC6639231; doi:10.4143/crt.2018.411), 2018-10-24
Supplement: crt-2018-411-suppl9.pdf [file crt-2018-411-suppl9.pdf]

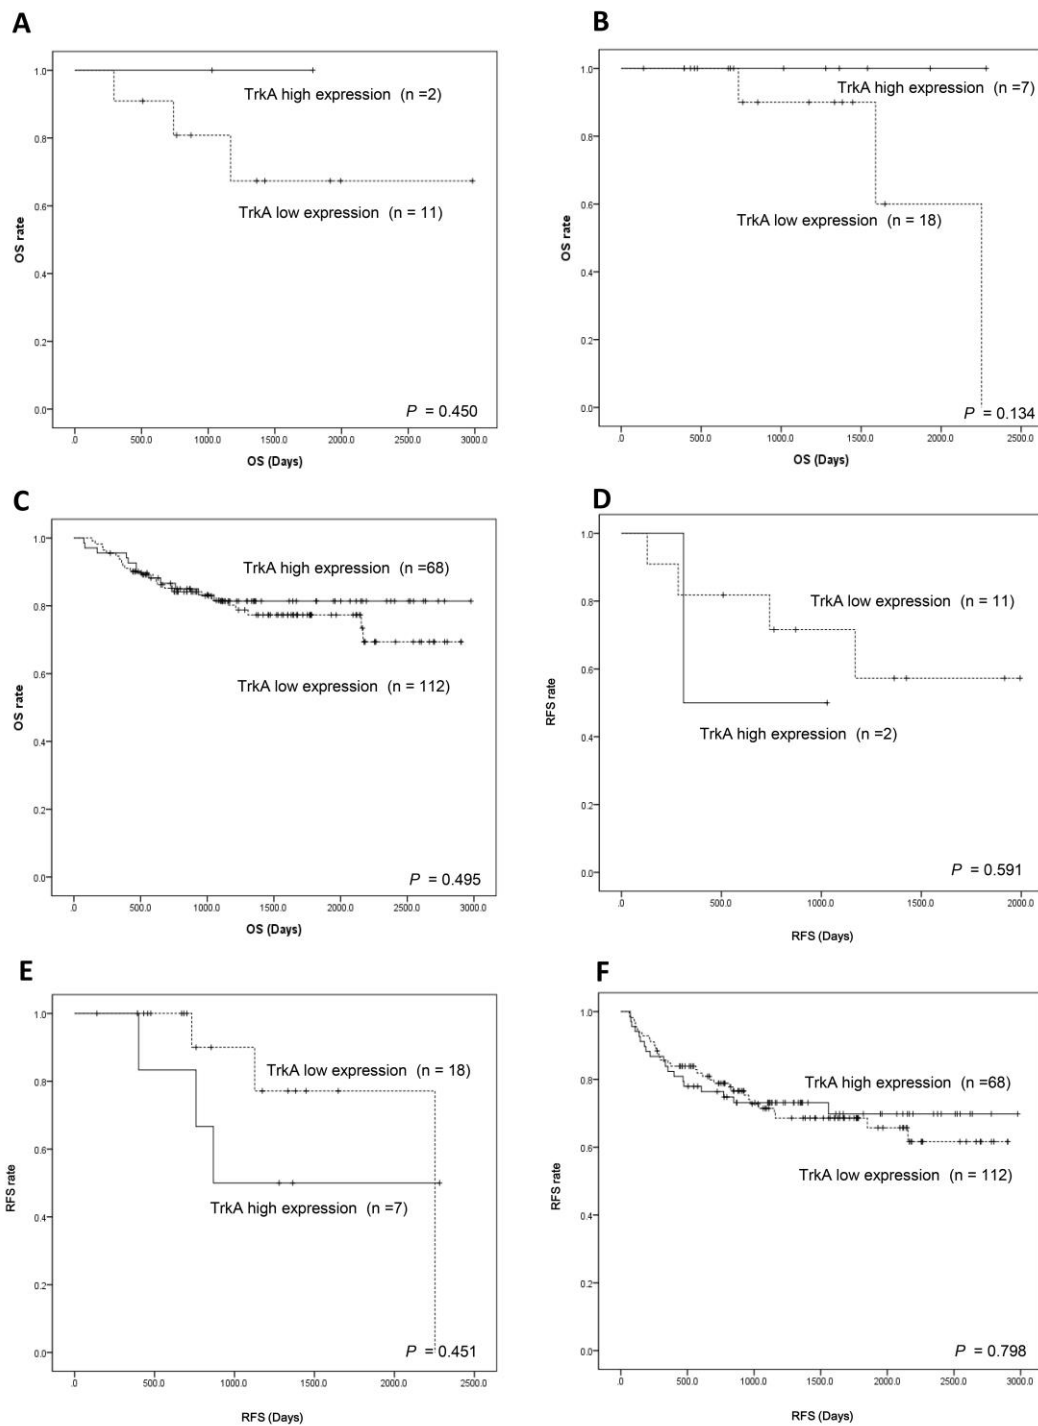

**S9 Fig.** Kaplan-Meier analysis of R0-resected non-oro-pharyngeal head and neck squamous cell carcinomas associated with TrkA expression. Other non-oro-pharyngeal SCCs, including hypopharyngeal, laryngeal, and oral cavity SCCs showed no significant correlation with expression of TrkA in OS (A, B, and C, respectively) and RFS (D, E, and F, respectively) in Kaplan-Meier analysis. SCC, squamous cell carcinoma; OS, overall survival; RFS, recurrence-free survival.
