# Supplementary material for: Investigating Trk Protein Expression between Oropharyngeal and Non-oropharyngeal Squamous Cell Carcinoma: Clinical Implications and Possible Roles of Human Papillomavirus Infection
Source: PubMed Central journal article supplement — Cancer Res Treat. 2018 Oct 24;51(3):1052–63. doi: 10.4143/crt.2018.411 (PMC6639231; doi:10.4143/crt.2018.411), 2018-10-24
Supplement: crt-2018-411-suppl10.pdf [file crt-2018-411-suppl10.pdf]

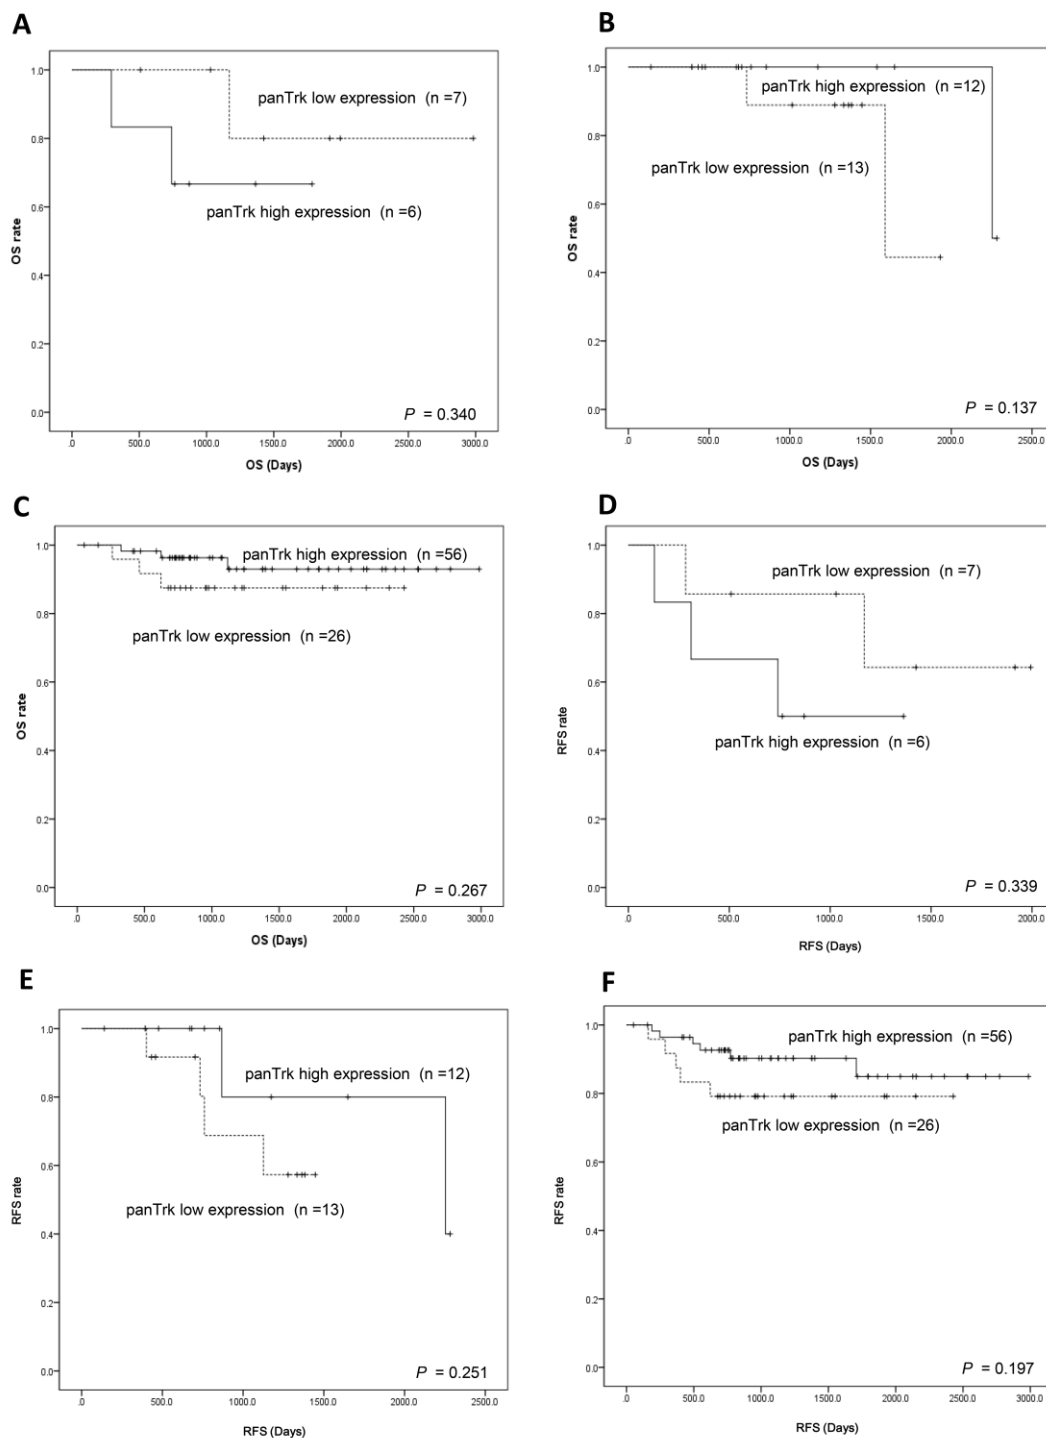

**S10 Fig.** Kaplan-Meier analysis of R0-resected head and neck squamous cell carcinomas considering panTrk expression. In hypopharyngeal, laryngeal, and oropharyngeal SCCs, there was no significant correlation with expression of panTrk in overall survival (A, B, and C, respectively) and recurrence-free survival (D, E, and F, respectively) in Kaplan-Meier analysis. SCC, squamous cell carcinoma; OS, overall survival; RFS, recurrence-free survival.
