# Supplementary material for: Investigating Trk Protein Expression between Oropharyngeal and Non-oropharyngeal Squamous Cell Carcinoma: Clinical Implications and Possible Roles of Human Papillomavirus Infection
Source: PubMed Central journal article supplement — Cancer Res Treat. 2018 Oct 24;51(3):1052–63. doi: 10.4143/crt.2018.411 (PMC6639231; doi:10.4143/crt.2018.411), 2018-10-24
Supplement: crt-2018-411-suppl11.pdf [file crt-2018-411-suppl11.pdf]

**S11 Table.** Univariate and multivariate analysis of RFS and OS in R0 resected oral cavity HNSCC (n=180)

| Variable                | OS                     |         |                        |         | RFS                    |         |                        |         |
|-------------------------|------------------------|---------|------------------------|---------|------------------------|---------|------------------------|---------|
|                         | Univariate             |         | Multivariate           |         | Univariate             |         | Multivariate           |         |
|                         | HR (95% CI)            | P-value |
| Age (yr) <sup>a)</sup>  |                        |         |                        |         |                        |         |                        |         |
| < 58                    | 1                      |         | 1                      |         | 1                      |         | 1                      |         |
| ≥ 58                    | 2.722<br>(1.378-5.376) | 0.004   | 2.317<br>(1.123-4.780) | 0.023   | 2.135<br>(1.231-3.702) | 0.007   | 1.935<br>(1.064-3.517) | 0.030   |
| Sex                     |                        |         |                        |         |                        |         |                        |         |
| Female                  | 1                      |         | -                      |         | 1                      |         | -                      |         |
| Male                    | 0.810<br>(0.419-1.565) | 0.531   | -                      | -       | 0.913<br>(0.525-1.589) | 0.748   | -                      | -       |
| Smoking                 |                        |         |                        |         |                        |         |                        |         |
| Non-smoker              | 1                      |         | -                      |         | 1                      |         | -                      |         |
| Ex-smoker               | 0.683<br>(0.256-1.820) | 0.446   | -                      | -       | 0.823<br>(0.372-1.818) | 0.629   | -                      | -       |
| Smoker                  | 1.073<br>(0.514-2.242) | 0.852   | -                      | -       | 1.317<br>(0.722-2.404) | 0.369   | -                      | -       |
| p16 IHC status          |                        |         |                        |         |                        |         |                        |         |
| Negative                | 1                      |         | -                      |         | 1                      |         | -                      |         |
| Positive                | 1.281<br>(0.497-3.306) | 0.608   | -                      | -       | 1.030<br>(0.439-2.417) | 0.945   | -                      | -       |
| Lymphovascular invasion |                        |         |                        |         |                        |         |                        |         |
| Absent                  | 1                      |         | 1                      |         | 1                      |         | 1                      |         |
| Present                 | 2.444<br>(1.063-5.618) | 0.035   | 1.918<br>(0.854-4.308) | 0.115   | 2.568<br>(1.282-5.143) | 0.008   | 1.983<br>(1.026-3.831) | 0.042   |
| Perineural invasion     |                        |         |                        |         |                        |         |                        |         |
| Absent                  | 1                      |         | -                      |         | 1                      |         | 1                      |         |
| Present                 | 1.737<br>(0.789-3.821) | 0.170   | -                      | -       | 2.262<br>(1.223-4.182) | 0.009   | 2.103<br>(1.083-4.083) | 0.028   |

|                       |                        |       |                        |       |                        |       |                        |       |
|-----------------------|------------------------|-------|------------------------|-------|------------------------|-------|------------------------|-------|
| Pathologic T category |                        |       |                        |       |                        |       |                        |       |
| pT1-2                 | 1                      |       | 1                      |       | 1                      |       | 1                      |       |
| pT3-4                 | 3.080<br>(1.536-6.176) | 0.002 | 2.685<br>(1.214-5.937) | 0.015 | 2.818<br>(1.560-5.089) | 0.001 | 2.082<br>(1.004-4.318) | 0.049 |
| Lymph node metastasis |                        |       |                        |       |                        |       |                        |       |
| Absent                | 1                      |       | -                      |       | 1                      |       | -                      |       |
| Present               | 1.914<br>(0.983-3.725) | 0.056 | -                      | -     | 1.527<br>(0.884-2.636) | 0.129 | -                      | -     |
| TrkA expression       |                        |       |                        |       |                        |       |                        |       |
| Low                   | 1                      |       | -                      |       | 1                      |       | -                      |       |
| High                  | 0.786<br>(0.393-1.572) | 0.496 | -                      | -     | 0.929<br>(0.528-1.634) | 0.798 | -                      | -     |
| TrkB expression       |                        |       |                        |       |                        |       |                        |       |
| Low                   | 1                      |       | -                      |       | 1                      |       | -                      |       |
| High                  | 0.641<br>(0.319-1.284) | 0.209 | -                      | -     | 0.564<br>(0.312-1.021) | 0.059 | -                      | -     |
| panTrk expression     |                        |       |                        |       |                        |       |                        |       |
| Low                   | 1                      |       | 1                      |       | 1                      |       | 1                      |       |
| High                  | 2.026<br>(1.040-3.948) | 0.038 | 1.197<br>(0.532-2.691) | 0.664 | 2.463<br>(1.423-4.264) | 0.001 | 1.904<br>(0.973-3.725) | 0.060 |

RFS, recurrence-free survival; OS, overall survival; HNSCC, head and neck squamous cell carcinoma; HR, hazard ratio; CI, confidence interval; IHC, immunohistochemistry. <sup>a)</sup>Median age of 82 patients was 58.0 years.
