# Supplementary material for: Investigating Trk Protein Expression between Oropharyngeal and Non-oropharyngeal Squamous Cell Carcinoma: Clinical Implications and Possible Roles of Human Papillomavirus Infection
Source: PubMed Central journal article supplement — Cancer Res Treat. 2018 Oct 24;51(3):1052–63. doi: 10.4143/crt.2018.411 (PMC6639231; doi:10.4143/crt.2018.411), 2018-10-24
Supplement: crt-2018-411-suppl12.pdf [file crt-2018-411-suppl12.pdf]

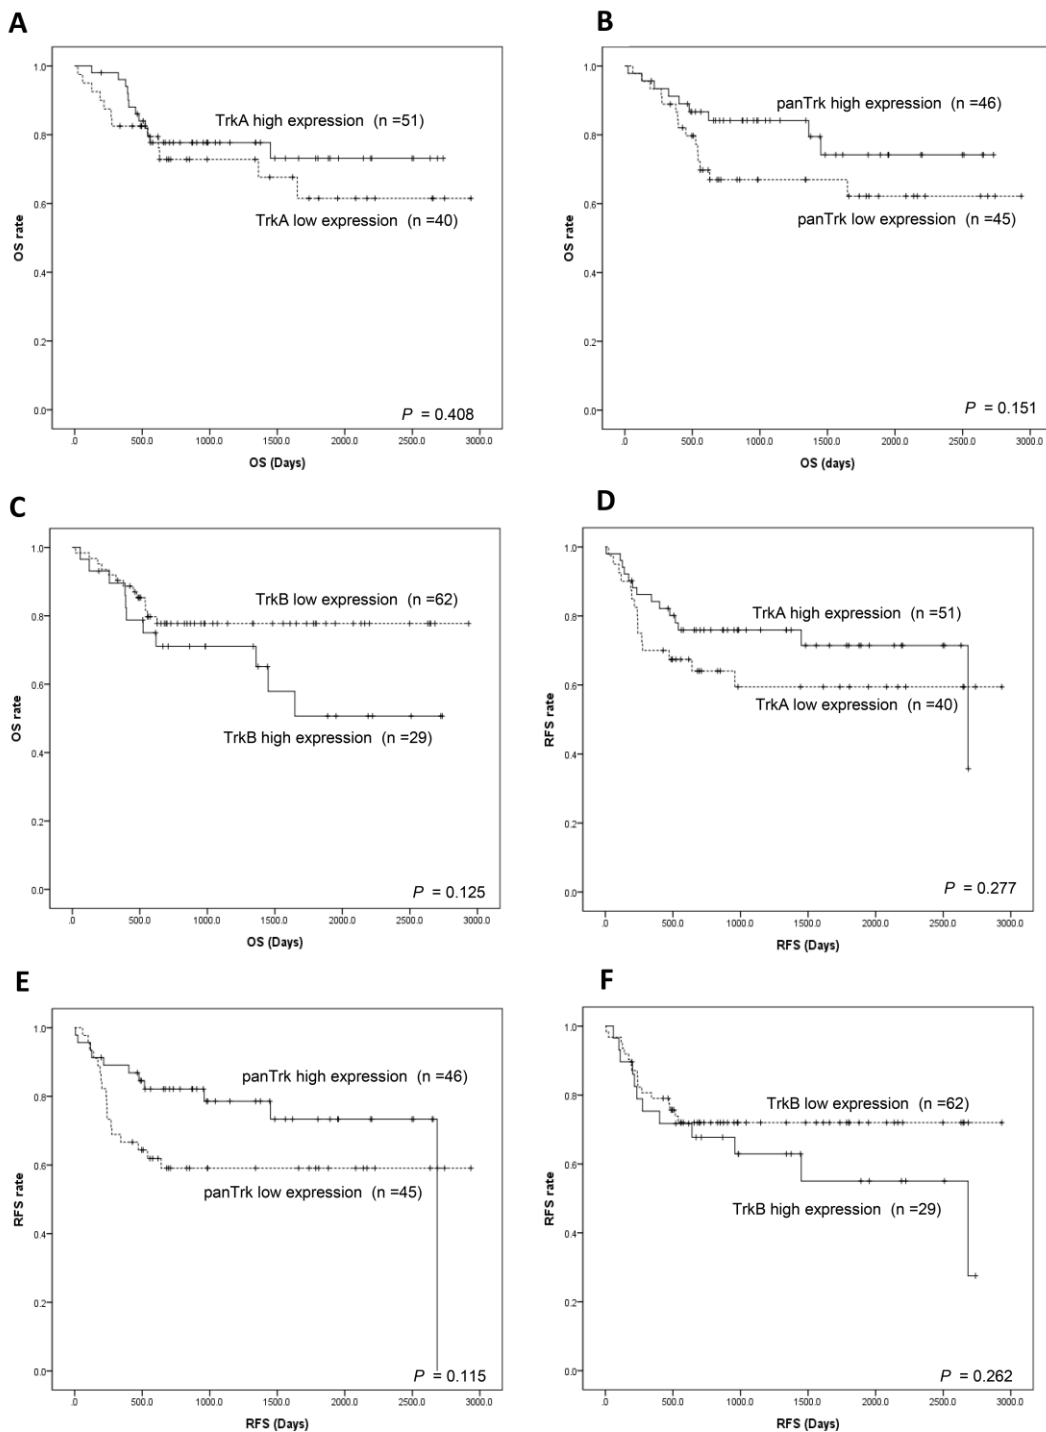

**S12 Fig.** Kaplan-Meier analysis of R1-resected head and neck squamous cell carcinomas in association with Trk expression. (A, D) In analysis of 91 R1 resected cases, no significant difference was observed in OS and RFS according to TrkA expression. (B, E) No significant difference was observed in OS and RFS according to panTrk expression. Furthermore, there was no significant difference of OS and RFS according to TrkB expression (C, F). OS, overall survival; RFS, recurrence-free survival; SCC, squamous cell carcinoma.
